# Supplementary material
Source: publisher figshare collection journal article supplement (https://sage.figshare.com/ndownloader/files/17763407)
Supplement: Supplementary file 1 [file 17763407]

# Study 1a - Pilot

## Severity Ratings: Immoral Behaviors

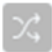

People engage in a variety of illegal behaviors. In the next part of the study we are interested in learning about how severe you find each of the following behaviors. Please rate how severe you find each of the following behaviors using the sliding scale.

| Not severe |   | Somewhat severe |   | Very severe |   |
|------------|---|-----------------|---|-------------|---|
| 1          | 2 | 3               | 5 | 6           | 7 |

|                                                                                                                  |                                                                                      |
|------------------------------------------------------------------------------------------------------------------|--------------------------------------------------------------------------------------|
| Taking a person's money by threatening them with a weapon ()                                                     |    |
| Blackmailing a person for money by threatening to post an unflattering picture of them on-line ()                |    |
| Breaking into someone's home and stealing a TV ()                                                                |    |
| Shoplifting merchandise from a department store ()                                                               |    |
| Pickpocketing someone's wallet while in a crowd of people ()                                                     |    |
| Stealing an unattended laptop from a coffee shop ()                                                              |    |
| Copying and selling DVDs ()                                                                                      |    |
| Passing off someone else's written work as original without permission or acknowledgment ()                      |    |
| Hacking into a neighbor's wireless router and using their Wi-Fi without their permission ()                      |    |
| Illegal downloading of music over the Internet ()                                                                |   |
| Using someone else's credit card to purchase something without their authorization ()                            |  |
| Writing a check knowing it will bounce ()                                                                        |  |
| Kidnapping a person ()                                                                                           |  |
| Illegally entering in an event without authorization (i.e., entering a concert without paying) ()                |  |
| Keeping a package that was mistakenly delivered to one's residence and not returning it to its rightful owner () |  |
| Leaving a restaurant without paying the check ()                                                                 |  |
| Eating a piece of fruit while shopping at the supermarket and not paying for it when you leave. ()               |  |
| Lying about how something broke when returning it to the store so you can get a new one ()                       |  |

# Study 1a

---

## Relationship Nomination

Thank you for participating in this study!

In the first part of this questionnaire, you will be asked to think about nine different people from your social network. These are actual people in your life. Your social network is the aggregate of all your interpersonal relationships.

For our purposes, the word relationship is a broad term that includes all of your mutual interpersonal interactions. This means that your social network includes all of your relationships, from the very intimate (e.g., romantic partners and best friends) to the very casual (e.g., your dentist and the people you work with that you don't know very well). The goal here is to think about the full relational spectrum of your social network.

As you think of the different people that make up your social network, you will be asked to provide their name\*, gender, and a very brief description of a few of them.

The following picture is provided to help you think about how each of your relationships fit within your social network.

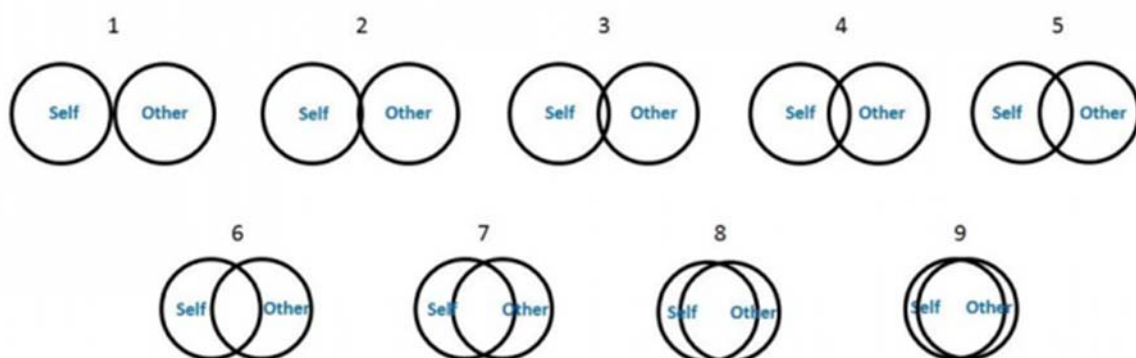

As you see the nine pairs of circles are ordered by the increasing degree of overlap between the two circles. One of the circles in each pair represents you (self) and the other represents the other person in the relationship (other). The overlap between the two circles represents the level of closeness between you and the other person in the relationship. The first (1) pair of circles represents minimal closeness (e.g., an acquaintance you barely know) and the ninth (9) pair

represents maximum closeness (e.g., an intimate partner you've known for several years).

As you think of each of the nine people it is important that they are at least 14 years old.

*\* Please only use first names. All information provided will be treated as anonymous and confidential. All information, publications, and data files associated with this project will be released in a way that no individual can be identified.*

---

### Start of Block: High Closeness Relationships Block

HC\_IOS

Using the image above, think of three people in your life in which your relationship with each person is best characterized by either the seventh (7), eighth (8) or ninth (9) set of circles (those highlighted in red, above). These are the people you are the closest to (e.g., spouse / partner, boyfriend / girlfriend, best friend, mother, child). Please list the first names of these three people (note: each person must be at least 14 years old):

-----

HC\_R1 Person one:

\_\_\_\_\_

-----

HC\_R2 Person two:

\_\_\_\_\_

-----

HC\_R3 Person three:

\_\_\_\_\_

-----

HCR1G What is **#{HC\_R1/ChoiceTextEntryValue}**'s gender?

☐ Male (1)

☐ Female (2)

---

HCR1R Please describe **#{HC\_R1/ChoiceTextEntryValue}** in terms of your relationship (e.g., spouse / partner, boyfriend / girlfriend, best friend, mother, child).

---

**Start of Block: Moderate Closeness Relationships Block**

MC\_IOS

Using the image above, think of three people in your life in which your relationship with each person is best characterized by either the fourth (4), fifth (5), or sixth (6) set of circles (those highlighted in red, above). These are the people in your life that you are moderately close with (e.g., father, sibling, mentor at work or school, teammate, work or school peer). Please list the first names of these three people (note: each person must be at least 14 years old):

---

MC\_R1 Person one:

---

MC\_R2 Person two:

---

MC\_R3 Person three:

MCR1G What is **`\${MC\_R1/ChoiceTextEntryValue}`**'s gender?

☐ Male (1)

☐ Female (2)

---

MCR1R Please describe **`\${MC\_R1/ChoiceTextEntryValue}`** in terms of your relationship (e.g., father, sibling, mentor at work or school, teammate, work or school peer).

---

Start of Block: Low Closeness Relationship Block

LC\_IOS

Using the image above, think of three people in your life in which your relationship with each person is best characterized by either the first (1), second (2), or third (3) set of circles (those highlighted in red, above). These are the people in your life that you have a relationship with, but are not very close to (e.g., your supervisor at work, advisor at school, physician, dentist, neighbor, pharmacist, postal worker). Please list the first names of these three people. However, if you can't recall their name just write a very brief description (i.e., postman, dentist, coworker). Please ensure that each person must be at least 14 years old.

---

LC\_R1 Person one:

---

---

LC\_R2 Person two:

---

---

LC\_R3 Person three:

---

---

LCR1G What is #{LC\_R1/ChoiceTextEntryValue}'s gender?

- ☐ Male (1)
- ☐ Female (2)
- 

LCR1R Please describe #{LC\_R1/ChoiceTextEntryValue} in terms of your relationship (e.g., your supervisor at work, advisor at school, physician, dentist, neighbor, pharmacist, or postman).

\_\_\_\_\_

---

Start of Block: Loyalty Dilemma instructions

LD\_Ins In the next section you will be asked a series of hypothetical questions. Please do your best to immerse yourself into the scenario and answer as if you were really there witnessing the situation being described.

---

End of Block: Loyalty Dilemma instructions

---

Start of Block: High Closeness - Relationship 1 - Illegally Download

HCR1ID You have just witnessed #{HC\_R1/ChoiceTextEntryValue} illegally download music over the internet without paying for it. A police officer approaches you and asks "do you know anything about this?" You answer:

- ☐ Yes, #{HC\_R1/ChoiceTextEntryValue} did illegally download music over the internet without paying for it (1)
- ☐ No, #{HC\_R1/ChoiceTextEntryValue} did not illegally download music over the internet without paying for it (2)

---

End of Block: High Closeness - Relationship 1- Illegally Download

---

Start of Block: Illegally Download Reply

Now please indicate the extent to which you agree with the following statements regarding the previous question.

|                                           | Strongly disagree<br>(1) | Somewhat disagree<br>(2) | Disagree a little (3) | Neither agree nor disagree<br>(4) | Agree a little (5)    | Somewhat agree (6)    | Strongly agree (7)    |
|-------------------------------------------|--------------------------|--------------------------|-----------------------|-----------------------------------|-----------------------|-----------------------|-----------------------|
| I am satisfied with this decision (1)     | <input type="radio"/>    | <input type="radio"/>    | <input type="radio"/> | <input type="radio"/>             | <input type="radio"/> | <input type="radio"/> | <input type="radio"/> |
| This is a good decision (2)               | <input type="radio"/>    | <input type="radio"/>    | <input type="radio"/> | <input type="radio"/>             | <input type="radio"/> | <input type="radio"/> | <input type="radio"/> |
| This was a difficult decision to make (3) | <input type="radio"/>    | <input type="radio"/>    | <input type="radio"/> | <input type="radio"/>             | <input type="radio"/> | <input type="radio"/> | <input type="radio"/> |

---

End of Block: Demographics

---

Start of Block: Manipulation Check

**Sports Participation** Most modern theories of decision-making recognize the fact that decisions do not take place in a vacuum. Individual preferences and knowledge, along with situational variables can greatly impact the decision process. In order to facilitate our research on decision-making, we are interested in knowing certain factors about you, the decision-maker. Specifically we are interested in whether you actually take the time to read the directions: if not, then some of our manipulations that rely on changes in the instructions will be ineffective. In order to demonstrate that you have read these instructions, please select cricket, badminton, and swimming below and no other answer choices. Thank you very much.

**Which of these activities do you engage in regularly?  
(Click on all that apply)**

☐ skiing (1)

☐ soccer (2)

☐ snowboarding (3)

☐ running (4)

☐ hockey (5)

☐ football (6)

☐ cricket (7)

☐ tennis (8)

☐ basketball (9)

☐ cycling (10)

☐ swimming (11)

☐ badminton (12)

**End of Block: IMC**

---

# Study 1b

---

## Start of Block: Relationship Instructions

Thank you for agreeing to participate in our study!

In the first part of this questionnaire, you will be asked to think about three different people from your social network. These are actual people in your life. Your social network is the aggregate of all of your interpersonal relationships.

For our purposes, the word relationship is a broad term that includes all of your mutual interpersonal interactions. This means that your social network includes all of your relationships, from the very intimate (e.g., romantic partners and best friends) to the very casual (e.g., your dentist and neighbors). The goal here is for you to think about the full relational spectrum of your social network.

As you think of the different people that make up your social network, you will be asked to provide the name\*, gender, and a very brief description of a few of them.

The following picture is provided to help you think about how each of your relationships fit within your social network.

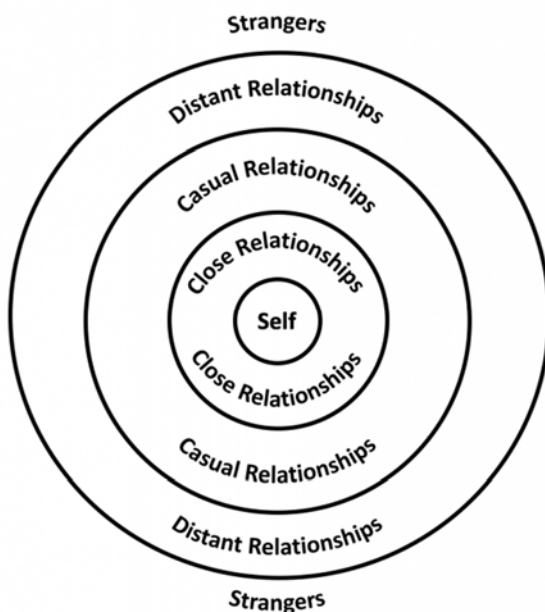

The circle at the center of this picture represents you and the three concentric circles that radiate from the center circle represents decreasing degrees of relationship closeness. If you were to organize all of your interpersonal relationships on this diagram, your closest relationships would be placed next to the center circle, your most distant relationships would be placed in the outermost circle, and the rest of your relationships would be arrayed between the innermost and outermost circles based on how close they are to you.

In a few moments, we are going to ask you to think about three people that represent one of these circles. Please make sure that the people that you think about are at least 18 years old.

\* Please only use first names. All information provided will be treated as anonymous and confidential. All information, publications, and data files associated with this project will be released in a way that no individual can be identified.

End of Block: General\_Relationship\_Instructions

---

Start of Block: Close\_Relationship\_Instructions

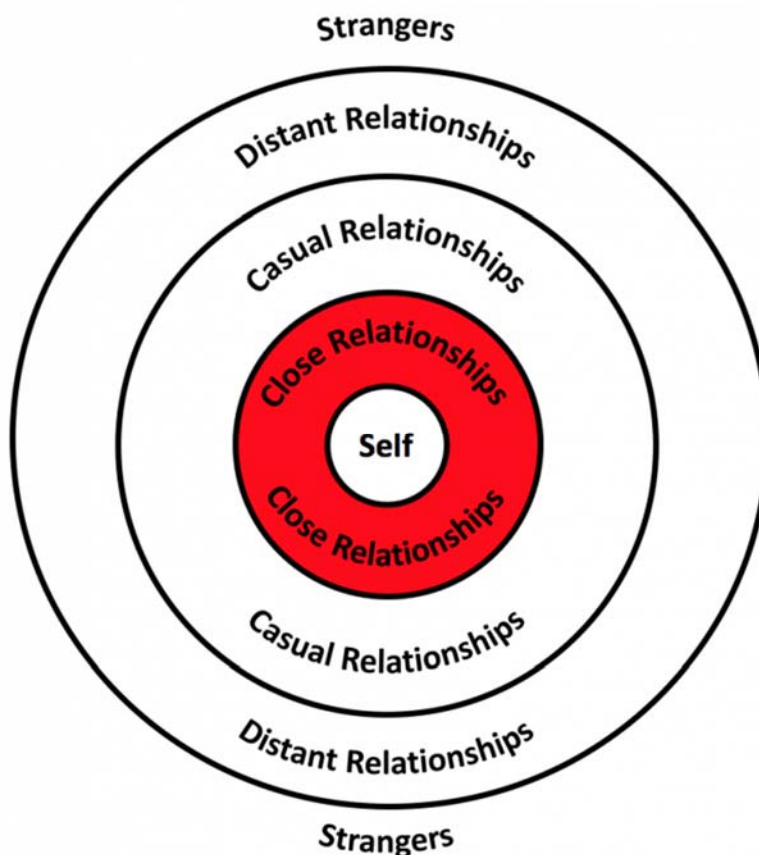

Using the image above, think of three people in your life in which your relationship with each person is best characterized by the circle colored in red. These are the people in your life that you are the most intimate with and closest to interpersonally (e.g., romantic partner, best friend, mother). Please list the first names (e.g. John, Alex, Amy) of these three individuals (note: each person must be at least 18 years old):

Close1\_Name Name of close relationship one:

---

Close2\_Name Name of close relationship two:

---

Close3\_Name Name of close relationship three:

---

End of Block: Close\_Relationship\_Instructions

Start of Block: Distant\_Relationship\_Instructions

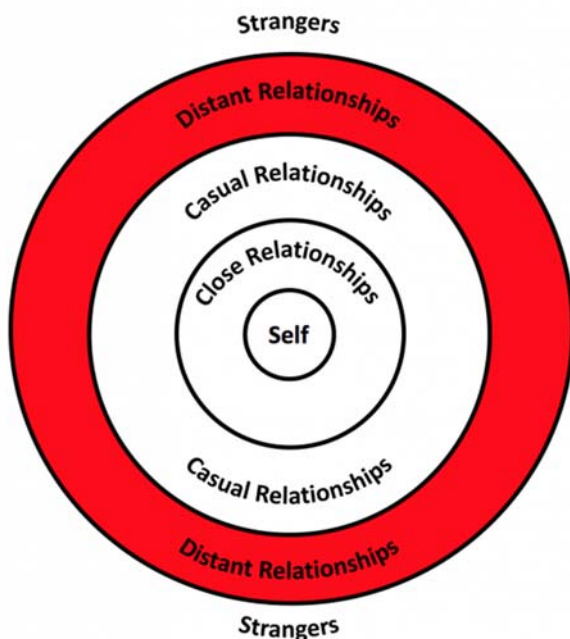

-----

Using the image above, think of three people in your life in which your relationship with each person is best characterized by the circle colored in red. These are the people in your life that you have a distant relationship with. These are people with whom you interact with, or are connected to, but are not at all close with (e.g., your dentist, neighbor, postal worker, cafe barista). Please list the first names (e.g. John, Alex, Amy) of these three individuals. If you can not recall the individual's name please write how you refer to that person. For example, for your doctor please write in "the doctor" (note: each person must be at least 18 years old).

-----

Dis1\_Name Name of distant relationship one:

\_\_\_\_\_

-----

Dis2\_Name Name of distant relationship two:

\_\_\_\_\_

-----

Dis3\_Name Name of distant relationship three:

\_\_\_\_\_

End of Block: Distant\_Relationship\_Instructions

---

Start of Block: Close\_Relationship\_1

Close1\_Gen What is **`\${Close1\_Name/ChoiceTextEntryValue}`**'s gender?

- ☐ Male (1)
  - ☐ Female (2)
  - ☐ Other (3)
-

Close1\_Des Please describe **`\${Close1\_Name/ChoiceTextEntryValue}`** in terms of your relationship (e.g., romantic partner, best friend, mother).

Close1\_IOS

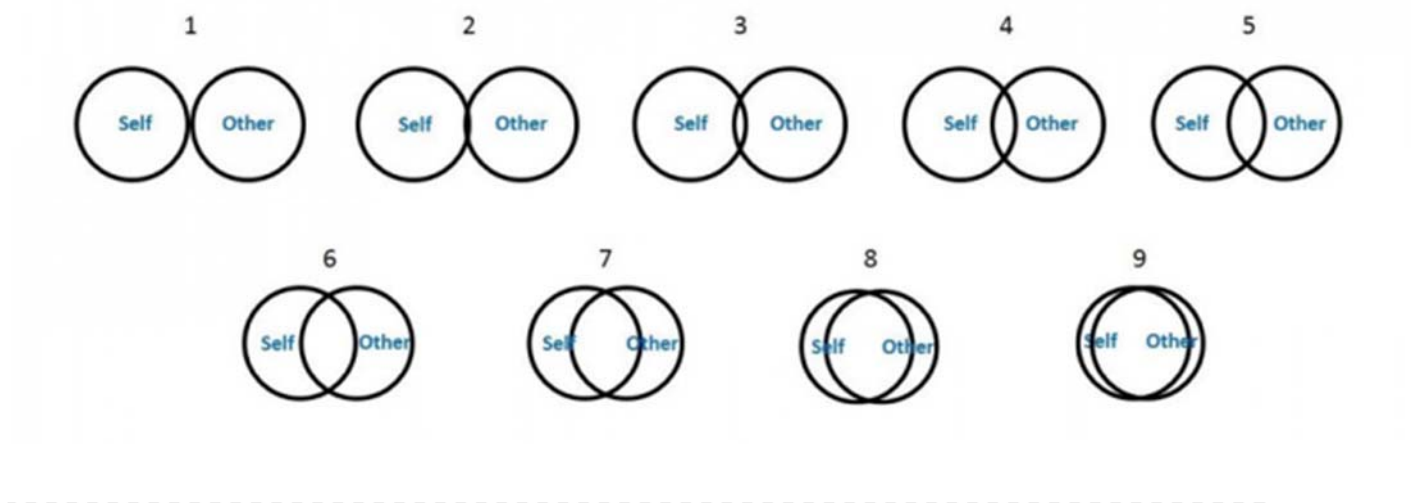

Close1\_Check The image above is another way to conceptualize your social network. As you see the nine pairs of circles are ordered by increasing degree of overlap. This overlap represents how close each relationship is in your social network. The first (1) pair of circles represents a relationship between you and another person with minimal closeness and the ninth (9) pair represents a relationship between you and another person where there is maximum closeness.

Using the nine sets of circles from the image above, please pick one (1-9) that best characterizes your relationship with **Close1\_Name/ChoiceTextEntryValue**.

- ☐ 1 (minimal closeness) (1)
- ☐ (2)
- ☐ (3)
- ☐ (4)
- ☐ (5)
- ☐ (6)
- ☐ (7)
- ☐ (8)
- ☐ 9 (maximum closeness) (9)

End of Block: Close\_Relationship\_1

---

Start of Block: Moral\_Dilemma\_Relationship\_Transition

Relationship\_Transit We're now ready to begin the next phase of the study.

During this phase, you will be presented a hypothetical scenario. Please read the scenario carefully. It is important that you do your best to immerse yourself into the situation and respond as if you were really experiencing the situation being described.

Although you may be asked to think about people that you know in ways that you are not accustomed to, the validity of our research depends on your cooperation.

Remember, there are no "right" or "wrong" answers to these questions. You will not be asked to justify your responses. Do not worry about whether the action is legal or illegal. Simply respond in whatever manner you believe to be accurate.

Thank you in advance for your undivided attention and effort.

Once you are set and ready to go, please press the "next" button to continue...

End of Block: Moral\_Dilemma\_Relationship\_Transition

---

## Start of Block: Moral\_Dilemma\_Close\_Relationship\_Serious

C\_S\_SCEN You and \${Close1\_Name/ChoiceTextEntryValue} are hanging out together at a local café. While at the café you observe \${Close1\_Name/ChoiceTextEntryValue} log into his or her computer and use another person's credit card to purchase a large amount of expensive merchandise without that person's authorization.

You are sure, without any doubt, that this is what happened. There is absolutely no way that this could be mistaken for anything else.

\${Close1\_Name/ChoiceTextEntryValue} leaves the café before you.

As you are leaving the café, a man stops you and asks to speak with you. After you agree to speak with him, he shows you a badge and introduces himself as a law enforcement agent investigating Internet-related crime. He asks you if you have witnessed any Internet related illegal activity such as hacking, fraud (e.g., unauthorized use of another person's credit card), or intellectual property theft today.

In answering this question, you can either tell the officer that you **did** or **did not** see \${Close1\_Name/ChoiceTextEntryValue} use another person's credit card to purchase a large amount of expensive merchandise without that person's authorization.

---

In a moment, you are going to respond to the officer.

But first, in order to better understand your thought process, we would like you to write down everything that you are thinking about as you contemplate this decision.

In the space below, please write a few (3-5) sentences that describe your stream of thoughts about this situation.

Remember to fully immerse yourself into the situation and honestly articulate exactly what you are thinking and feeling.

---

---

---

---

---

C\_S\_MD In your response to the officer, how likely are you to tell him that you did witness [\\${Close1\\_Name/ChoiceTextEntryValue}](#) use another person's credit card to purchase merchandise without that person's authorization?

- ☐ Very Unlikely (1)
- ☐ Unlikely (2)
- ☐ Somewhat Unlikely (3)
- ☐ Somewhat Likely (4)
- ☐ Likely (5)
- ☐ Very Likely (6)

Attention\_Check If you are reading this question, please leave it blank.

- ☐ Yes, I'm paying attention and reading the questions carefully (1)
- ☐ No, I'm just skimming the questions (2)

# Study 1c - Pilot

---

## Start of Block: Introduction

Q25 Welcome to our study and thank you for participating. In this study, we are going to present you with a series of scenarios involving behaviors. We ask that you please read each scenario, and answer a set of four questions about the behavior involved.

There are 24 scenarios in total.

---

## End of Block: Introduction

---

## Start of Block: Me Too Scenario 1

A man corners an intoxicated, scantily dressed woman in a bar restroom and forces her to have sex.

|                                                                                                | Not at all |   | Somewhat |   | Very  |   |
|------------------------------------------------------------------------------------------------|------------|---|----------|---|-------|---|
|                                                                                                | 1          | 2 | 3        | 5 | 6     | 7 |
| How severe is this act? ()                                                                     |            |   |          |   |       |   |
|                                                                                                | None       |   | Some     |   | A lot |   |
|                                                                                                | 1          | 2 | 3        | 5 | 6     | 7 |
| How much harm (i.e., physical or emotional suffering) would come to the victim of this act? () |            |   |          |   |       |   |
|                                                                                                | Not at all |   | Somewhat |   | Very  |   |
|                                                                                                | 1          | 2 | 3        | 5 | 6     | 7 |
| How relevant is this act to you personally? ()                                                 |            |   |          |   |       |   |

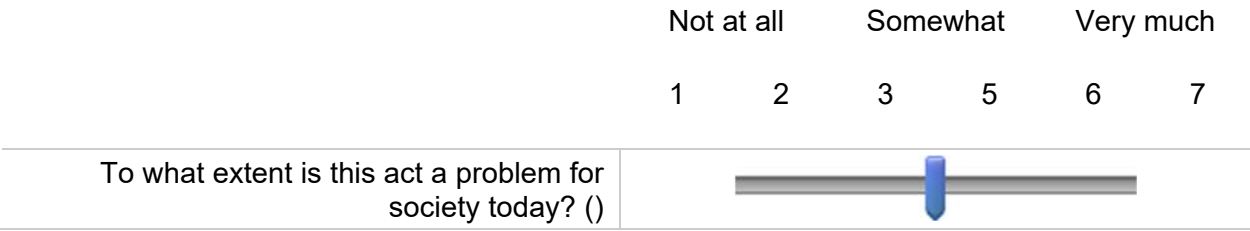

End of Block: Me Too Scenario 1

# Study 1c

---

## Start of Block: Intro

Q9 Thank you for participating in this study!

This study examines how people evaluate another person's behavior. It should take 5 to 7 minutes to complete. All answers will remain confidential. Please answer the questions to the best of your ability. There are no right or wrong answers.

---

## End of Block: Intro

---

## Start of Block: Relationship Prompt: Close

Q10 In the first part of this survey you will be asked to think about a person in your life who you would consider **yourself very close to**. Please think of an actual relationship that you have with another person. The goal here is for you to think about the person in your life that you would categorize as **one of your closest relationships**. *IMPORTANT: The person you are thinking about must be a man, and must be at least 18 years old.* The following picture is provided to help you think about this person and how he fits into your social network:

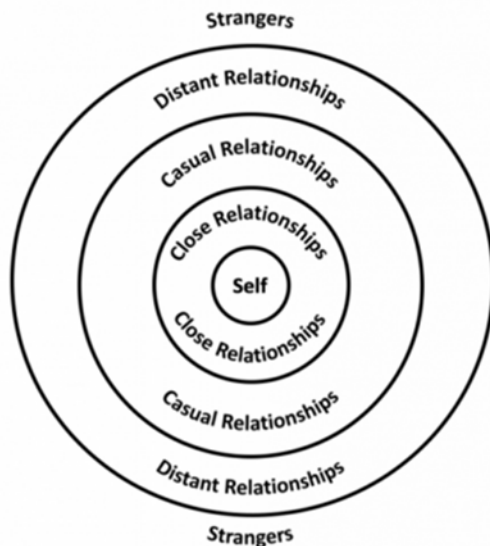

Q12 The circle at the center of this picture represents you and the five circles that radiate from the center circle represent relationship closeness. If you were to organize all of your interpersonal relationships on this diagram, your closest relationships would be placed next to the center circle, your most distant acquaintance would be placed outside the outermost circle, and the rest of your relationships would be arrayed between the innermost and outermost circles based on how close they are to you.

For this exercise, please think about **someone who is very close to you**. This person would be **located on the innermost circle in the picture above**.

Now that you've thought about this person, please provide their name and a brief description of your relationship with that person (**e.g., father, spouse, brother, best friend**).

*REMINDER: The person you name must be a man, and must be at least 18 years old.*

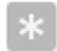

Q13 What is this man's **first name**?

---

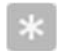

Q16 How would you describe this relationship (**e.g., father, spouse, brother, best friend**)?

---

---

Q14 \* All information provided will be treated as anonymous and confidential. All information, publications, and data files associated with this project will be released in a way that insures that no individuals can be identified.

End of Block: Relationship Prompt: Close

---

Start of Block: Relationship Prompt: Distant

Q251 In the first part of this survey you will be asked to think about a person in your life who you would consider **a distant acquaintance**. Please think of an actual relationship that you have with another person. The goal here is for you to think about the person in your life that you would categorize as **one of your most distant acquaintances**. *IMPORTANT: The person*

*you are thinking about must be a man, and must be at least 18 years old.* The following picture is provided to help you think about this person and how he fits into your social network:

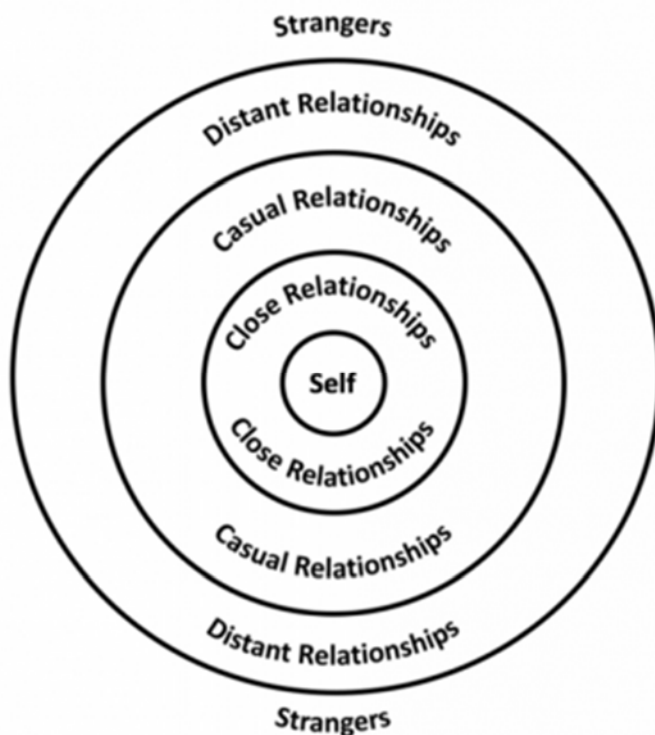

---

Q253 The circle at the center of this picture represents you and the five circles that radiate from the center circle represent relationship closeness. If you were to organize all of your interpersonal relationships on this diagram, your closest relationships would be placed next to the center circle, your most distant acquaintance would be placed outside the outermost circle, and the rest of your relationships would be arrayed between the innermost and outermost circles based on how close they are to you.

For this exercise, please think about **someone who is a very distant acquaintance**. This person would be **located on the outermost circle in the picture above**.

Now that you've thought about this person, please provide their name and a brief description of your relationship with that person (**e.g., mailman, landlord, neighbor, dentist**).

*REMINDER: The person you name must be a man, and must be at least 18 years old.*

---

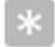

Q254 What is this man's **first name**?

---

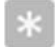

Q255 How would you describe this relationship (**e.g., mailman, landlord, neighbor, dentist**)?

---

Q256 *\* All information provided will be treated as anonymous and confidential. All information, publications, and data files associated with this project will be released in a way that insures that no individuals can be identified.*

End of Block: Relationship Prompt: Distant

---

Start of Block: Behavior Evaluation: Intro

Q59 During the next phase of the study, you will be asked to consider a scenario involving a behavior. Please read the scenario carefully. It is important that you do your best to immerse yourself in the scenario and respond as if you were really experiencing the situation being described.

Although you may be asked to think about people that you know in ways that you are not accustomed to, the validity of our research depends on your cooperation.

Remember, there are no "right" or "wrong" answers to these questions. You will not be asked to justify your responses. Simply respond in whatever manner you believe to be accurate.

End of Block: Behavior Evaluation: Intro

---

Start of Block: Behavior: High Severity Sex 1

Q18 You and [\\${Q13/ChoiceTextEntryValue}](#) are walking together on a busy sidewalk. At one point, you enter a crowd of people and you notice him reach out his hand and cup an attractive woman's breast, even though the woman is clearly not interested. You are sure, without any doubt, that this is what happened. There is absolutely no way that this act could be mistaken for anything else. Since the act [\\${Q13/ChoiceTextEntryValue}](#) committed was unwanted sexual contact with the woman, it constitutes sexual harassment in the eye of the law.

Soon thereafter, a man approaches you and asks to speak with you. After you agree to speak with him, he shows you a badge and introduces himself as a law enforcement officer investigating sexual harassment. The officer asks you if you have witnessed any suspicious activity today. In answering this question, you can either tell the officer that you **did see** or **did not see** [\\${Q13/ChoiceTextEntryValue}](#) covertly reach out his hand and cup a woman's breast.

---

Page Break

Q30 In your response to the officer, **how likely** are you to tell him that you DID SEE [\\${Q13/ChoiceTextEntryValue}](#) commit the act in question?

|     | Very unlikely | Unlikely | Somewhat unlikely | Somewhat likely | Likely | Very likely |
|-----|---------------|----------|-------------------|-----------------|--------|-------------|
|     | 1             | 2        | 3                 | 5               | 6      |             |
| ( ) |               |          |                   |                 |        |             |

---

Page Break

Finally, how upsetting was it to make this decision?

|     | Not at all |   | Somewhat |   | Very much |   |
|-----|------------|---|----------|---|-----------|---|
|     | 1          | 2 | 3        | 5 | 6         | 7 |
| ( ) |            |   |          |   |           |   |

End of Block: Behavior: High Severity Sex 1

Start of Block: Questionnaire Intro

Q32 In the next part of this study, we ask that you complete several questionnaires about your beliefs.

There are three pages of questionnaires, each with approximately 15-20 items.

End of Block: Questionnaire Intro

## Start of Block: MFQ Relevance

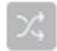

Q29 When you decide whether something is right or wrong, to what extent are the following considerations relevant to your thinking? Please rate each statement using this scale:

Not at all relevant    Not very relevant    Slightly relevant    Somewhat relevant    Very relevant    Extremely relevant

1                      2                      3                      5                      6

|                                                                       |  |
|-----------------------------------------------------------------------|--|
| Whether or not someone suffered emotionally ()                        |  |
| Whether or not someone cared for someone weak or vulnerable ()        |  |
| Whether or not someone was cruel ()                                   |  |
| Whether or not some people were treated differently from others ()    |  |
| Whether or not someone acted unfairly ()                              |  |
| Whether or not someone was denied his or her rights ()                |  |
| Whether or not someone's action showed love for his or her country () |  |
| Whether or not someone did something to betray his or her group ()    |  |
| Whether or not someone showed a lack of loyalty ()                    |  |
| Whether or not someone showed a lack of respect for authority ()      |  |
| Whether or not someone conformed to the traditions of society ()      |  |
| Whether or not an action caused chaos or disorder ()                  |  |
| Whether or not someone violated standards of purity and decency ()    |  |
| Whether or not someone did something disgusting ()                    |  |
| Whether or not someone acted in a way that God would approve of ()    |  |

## End of Block: MFQ Relevance

### Start of Block: MFQ Judgments

Q30 Please indicate your agreement or disagreement with the following sentences.

|                                                                                                                       | Strongly disagree | Moderately disagree | Slightly disagree | Slightly agree | Moderately agree | Strongly agree |
|-----------------------------------------------------------------------------------------------------------------------|-------------------|---------------------|-------------------|----------------|------------------|----------------|
|                                                                                                                       | 1                 | 2                   | 3                 | 5              | 6                |                |
| Compassion for those who are suffering is the most crucial virtue ()                                                  |                   |                     |                   |                |                  |                |
| One of the worst things a person could do is hurt a defenseless animal ()                                             |                   |                     |                   |                |                  |                |
| It can never be right to kill a human being ()                                                                        |                   |                     |                   |                |                  |                |
| When the government makes laws, the number one principle should be ensuring that everyone is treated fairly ()        |                   |                     |                   |                |                  |                |
| Justice is the most important requirement for a society ()                                                            |                   |                     |                   |                |                  |                |
| I think it's morally wrong that rich children inherit a lot of money while poor children inherit nothing ()           |                   |                     |                   |                |                  |                |
| I am proud of my country's history ()                                                                                 |                   |                     |                   |                |                  |                |
| People should be loyal to their family members, even when they have done something wrong ()                           |                   |                     |                   |                |                  |                |
| It is more important to be a team player than to express oneself ()                                                   |                   |                     |                   |                |                  |                |
| Respect for authority is something all children need to learn ()                                                      |                   |                     |                   |                |                  |                |
| Men and women each have different roles to play in society ()                                                         |                   |                     |                   |                |                  |                |
| If I were a soldier and disagreed with my commanding officer's orders, I would obey anyway because that is my duty () |                   |                     |                   |                |                  |                |
| People should not do things that are disgusting, even if no one is harmed ()                                          |                   |                     |                   |                |                  |                |
| I would call some acts wrong on the grounds that they are unnatural ()                                                |                   |                     |                   |                |                  |                |
| Chastity is an important and valuable virtue ()                                                                       |                   |                     |                   |                |                  |                |
| If you are paying attention please select moderately agree for this item ()                                           |                   |                     |                   |                |                  |                |

### Start of Block: Three Domains Disgust

Q31 p.p1 {margin: 0.0px 0.0px 0.0px 0.0px; font: 9.0px Times} Please rate how **disgusting** you find each of the following actions.

|                                                                                   | Not at all<br>disgusting | Moderately<br>disgusting | Very disgusting |
|-----------------------------------------------------------------------------------|--------------------------|--------------------------|-----------------|
|                                                                                   | 1                        | 2                        | 3 5 6 7         |
| Shoplifting a candy bar from a convenience store ()                               |                          |                          |                 |
| Hearing two strangers having sex ()                                               |                          |                          |                 |
| Stepping on dog poop ()                                                           |                          |                          |                 |
| Stealing from a neighbor ()                                                       |                          |                          |                 |
| Performing oral sex ()                                                            |                          |                          |                 |
| Sitting next to someone who has red sores on their arm ()                         |                          |                          |                 |
| A student cheating to get good grades ()                                          |                          |                          |                 |
| Watching a pornographic video ()                                                  |                          |                          |                 |
| Shaking hands with a stranger who has sweaty palms ()                             |                          |                          |                 |
| Deceiving a friend ()                                                             |                          |                          |                 |
| Finding out that someone you don't like has sexual fantasies about you ()         |                          |                          |                 |
| Seeing some mold on old leftovers in your refrigerator ()                         |                          |                          |                 |
| Forging someone's signature on a legal document ()                                |                          |                          |                 |
| Bringing someone you just met back to your room to have sex ()                    |                          |                          |                 |
| Standing close to a person who has body odor ()                                   |                          |                          |                 |
| Cutting to the front of a line to purchase the last few tickets to a show ()      |                          |                          |                 |
| A stranger of the opposite sex intentionally rubbing your thigh in an elevator () |                          |                          |                 |
| Seeing a cockroach run across the floor ()                                        |                          |                          |                 |

|                                                      |                                                                                    |
|------------------------------------------------------|------------------------------------------------------------------------------------|
| Intentionally lying during a business transaction () |  |
| Having anal sex with someone of the opposite sex ()  |  |
| Accidentally touching a person's bloody cut ()       |  |

End of Block: Three Domains Disgust

Start of Block: Demographics

Q106 This is the last page of the survey! We are interested in learning more about your background.

---

Q107 What is your gender?

- ☐ Male (1)
- ☐ Female (2)
- ☐ Other, please specify (3) \_\_\_\_\_

Q108 What is your age?

\_\_\_\_\_

Q109 What is your race?

☐ White (1)

☐ Asian (2)

☐ Black or African American (3)

☐ Hispanic / Latino (4)

☐ Native Hawaiian or Pacific Islander (5)

☐ Native American (6)

☐ Other (7) \_\_\_\_\_

Q28 How would you describe your political orientation?

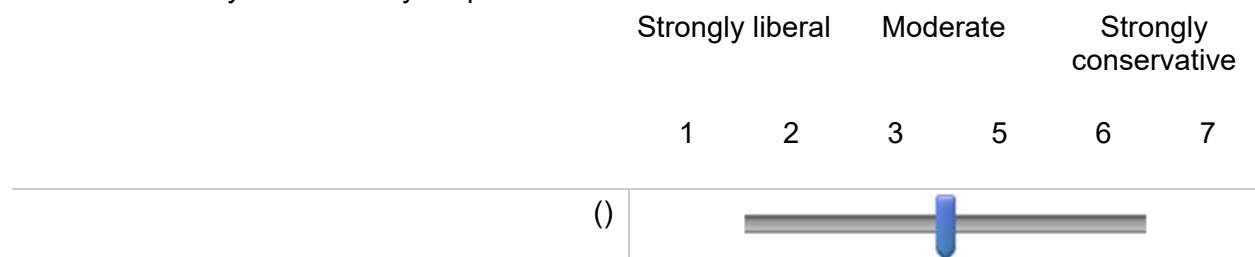

Q110 It is very important for us to have reliable and valid data. Would you recommend that we use your responses to this survey as part of our study?

☐ Yes (1)

☐ No (2)

End of Block: Demographics

## Study 1d

Start of Block: Intro

Thank you for participating in this study!

This study examines how people evaluate another person's behavior. It should take about 10 minutes to complete. All answers will remain confidential. Please answer the questions to the best of your ability. There are no right or wrong answers.

End of Block: Intro

---

Start of Block: Relationship Prompt: Close

Q10 In the first part of this survey you will be asked to think about a person in your life who you would consider **yourself very close to**. Please think of an actual relationship that you have with another person. The goal here is for you to think about the person in your life that you would categorize as **one of your closest relationships**. *IMPORTANT: The person you are thinking about must at least 18 years old.* The following picture is provided to help you think about this person and how he/she fits into your social network:

Q11

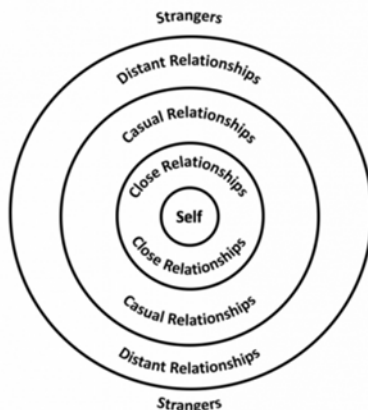

---

Q12 The circle at the center of this picture represents you and the five circles that radiate from the center circle represent relationship closeness. If you were to organize all of your interpersonal relationships on this diagram, your closest relationships would be placed next to the center circle, your most distant acquaintance would be placed outside the outermost circle, and the rest of your relationships would be arrayed between the innermost and outermost circles based on how close they are to you.

For this exercise, please think about **someone who is very close to you**. This person would be **located on the innermost circle in the picture above**.

Now that you've thought about this person, on the next page please provide their name and a brief description of your relationship with that person (**e.g., father, spouse, brother, best friend**).

*REMINDER: The person you name must be at least 18 years old.*

End of Block: Relationship Prompt: Close

---

Start of Block: Relationship Prompt: Distant

Q251 In the first part of this survey you will be asked to think about a person in your life who you would consider **a distant acquaintance**. Please think of an actual relationship that you have with another person. The goal here is for you to think about the person in your life that you would categorize as **one of your most distant acquaintances**. *IMPORTANT: The person you are thinking about must be at least 18 years old.* The following picture is provided to help you think about this person and how he/she fits into your social network:

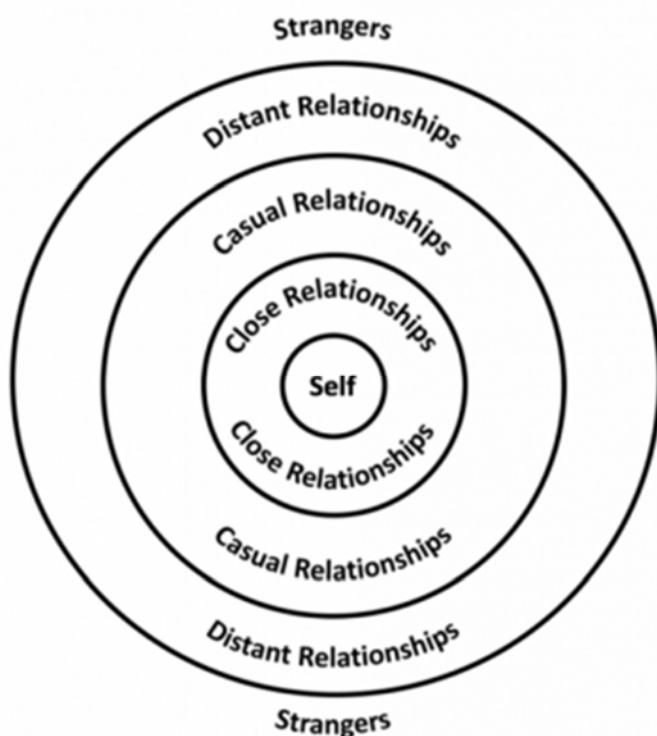

Q253 The circle at the center of this picture represents you and the five circles that radiate from the center circle represent relationship closeness. If you were to organize all of your interpersonal relationships on this diagram, your closest relationships would be placed next to

the center circle, your most distant acquaintance would be placed outside the outermost circle, and the rest of your relationships would be arrayed between the innermost and outermost circles based on how close they are to you.

For this exercise, please think about **someone who is a very distant acquaintance**. This person would be **located on the outermost circle in the picture above**.

Now that you've thought about this person, on the next page please provide their name and a brief description of your relationship with that person (**e.g., mailman, landlord, neighbor, dentist**).

*REMINDER: The person you name must be at least 18 years old.*

End of Block: Relationship Prompt: Distant

---

Start of Block: Person Nomination

Q66 What is this person's **first name**?

---

Q67 How would you describe this relationship?

---

Q68 *\* All information provided will be treated as anonymous and confidential. All information, publications, and data files associated with this project will be released in a way that insures that no individuals can be identified.*

End of Block: Person Nomination

---

Start of Block: Behavior Evaluation: Intro

Q59 During the next phase of the study, you will be asked to consider a scenario involving a behavior. Please read the scenario carefully. It is important that you do your best to immerse yourself in the scenario and respond as if you were really experiencing the situation being described.

Although you may be asked to think about people that you know in ways that you are not

accustomed to, the validity of our research depends on your cooperation.

Remember, there are no "right" or "wrong" answers to these questions. You will not be asked to justify your responses. Simply respond in whatever manner you believe to be accurate.

End of Block: Behavior Evaluation: Intro

---

Start of Block: Behavior: High Severity Theft 1

Q266 You and \${Q66/ChoiceTextEntryValue} are sitting together at a coffee shop. At one point, you see that he/she is blackmailing a person for money by threatening to post an unflattering picture of them online. You are sure, without any doubt, that this is what happened. There is absolutely no way that this act could be mistaken for anything else.

Soon thereafter, a man approaches you and asks to speak with you. After you agree to speak with him, he shows you a badge and introduces himself as a law enforcement agent. He asks you if you have witnessed any suspicious activity today. In answering this question, you can either tell the officer that you **did see** or **did not see** \${Q66/ChoiceTextEntryValue} blackmailing a person for money by threatening to post an unflattering picture of them online.

End of Block: Behavior: High Severity Theft 1

---

Start of Block: Disgust and Anger

Q340 To what extent does witnessing this act make you feel:

| Not at all |   | Somewhat |   | Very much |   |
|------------|---|----------|---|-----------|---|
| 1          | 2 | 3        | 5 | 6         | 7 |

|                |                                                                                    |
|----------------|------------------------------------------------------------------------------------|
| Angry ()       |  |
| Mad ()         |  |
| Pissed Off ()  |  |
| Enraged ()     |  |
| Grossed Out () |  |
| Sickened ()    |  |
| Revulsion ()   |  |
| Nauseated ()   |  |

End of Block: Disgust and Anger

Start of Block: Self-Interest

Q48 To what extent is it in your own **self-interest** to tell the officer that you DID SEE [\\${Q66/ChoiceTextEntryValue}](#) commit the act in question?

Not at all      Somewhat      Very much

1      2      3      5      6      7

|    |                                                                                      |
|----|--------------------------------------------------------------------------------------|
| () |  |
|----|--------------------------------------------------------------------------------------|

Q50 To what extent is it in your own **self-interest** to tell the officer that you DID NOT SEE [\\${Q66/ChoiceTextEntryValue}](#) commit the act in question?

Not at all      Somewhat      Very much

1      2      3      5      6      7

|    |                                                                                      |
|----|--------------------------------------------------------------------------------------|
| () |  |
|----|--------------------------------------------------------------------------------------|

End of Block: Self-Interest

Start of Block: Loyalty

Q52 To what extent would it be **disloyal** to tell the officer that you DID  
SEE \${Q66/ChoiceTextEntryValue} commit the act in question?

Not at all      Somewhat      Very much  
1      2      3      5      6      7

|     |                                                                                    |
|-----|------------------------------------------------------------------------------------|
| ( ) |  |
|-----|------------------------------------------------------------------------------------|

Q54 To what extent would it be **disloyal** to tell the officer that you DID NOT  
SEE \${Q66/ChoiceTextEntryValue} commit the act in question?

Not at all      Somewhat      Very much  
1      2      3      5      6      7

|     |                                                                                      |
|-----|--------------------------------------------------------------------------------------|
| ( ) |  |
|-----|--------------------------------------------------------------------------------------|

End of Block: Loyalty

Start of Block: Harm

Q56 How much **harm (i.e., physical or emotional suffering)** would come to other people  
(including \${Q66/ChoiceTextEntryValue}) if you tell the officer that you DID  
SEE \${Q66/ChoiceTextEntryValue} commit the act in question?

None      Some      A lot  
1      2      3      5      6      7

|     |                                                                                      |
|-----|--------------------------------------------------------------------------------------|
| ( ) |  |
|-----|--------------------------------------------------------------------------------------|

Q58 How much harm (i.e., physical or emotional suffering) would come to other people (including \${Q66/ChoiceTextEntryValue}) if you tell the officer that you DID NOT SEE \${Q66/ChoiceTextEntryValue} commit the act in question?

|     | None | Some | A lot |   |   |   |
|-----|------|------|-------|---|---|---|
|     | 1    | 2    | 3     | 5 | 6 | 7 |
| ( ) |      |      |       |   |   |   |

End of Block: Harm

Start of Block: Perspective-Taking

Q59 To what extent are you trying to get inside \${Q66/ChoiceTextEntryValue}'s head and determine why he/she committed the crime?

|     | Not at all | Somewhat | Very much |   |   |   |
|-----|------------|----------|-----------|---|---|---|
|     | 1          | 2        | 3         | 5 | 6 | 7 |
| ( ) |            |          |           |   |   |   |

End of Block: Perspective-Taking

Start of Block: Demographics

Q106 This is the last page of the survey! We are interested in learning more about your background.

Q107 What is your gender?

- ☐ Male (1)
- ☐ Female (2)
- ☐ Other, please specify (3) \_\_\_\_\_

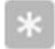

Q108 What is your age?

---

Q109 What is your race?

☐ White (1)

☐ Asian (2)

☐ Black or African American (3)

☐ Hispanic / Latino (4)

☐ Native Hawaiian or Pacific Islander (5)

☐ Native American (6)

☐ Other (7) \_\_\_\_\_

Q28 How would you describe your political orientation?

Strongly liberal

Moderate

Strongly  
conservative

1

2

3

5

6

7

( )

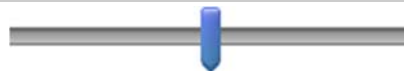

Q110 It is very important for us to have reliable and valid data. Would you recommend that we use your responses to this survey as part of our study?

☐ Yes (1)

☐ No (2)

**End of Block: Demographics**

# Study 1e

---

## Start of Block: Relationship Prompt: Close

Q10 In the first part of this survey you will be asked to think about a person in your life who you would consider **yourself very close to**. Please think of an actual relationship that you have with another person. The goal here is for you to think about the person in your life that you would categorize as **one of your closest relationships**. *IMPORTANT: The person you are thinking about must at least 18 years old.* The following picture is provided to help you think about this person and how he/she fits into your social network:

---

Q11

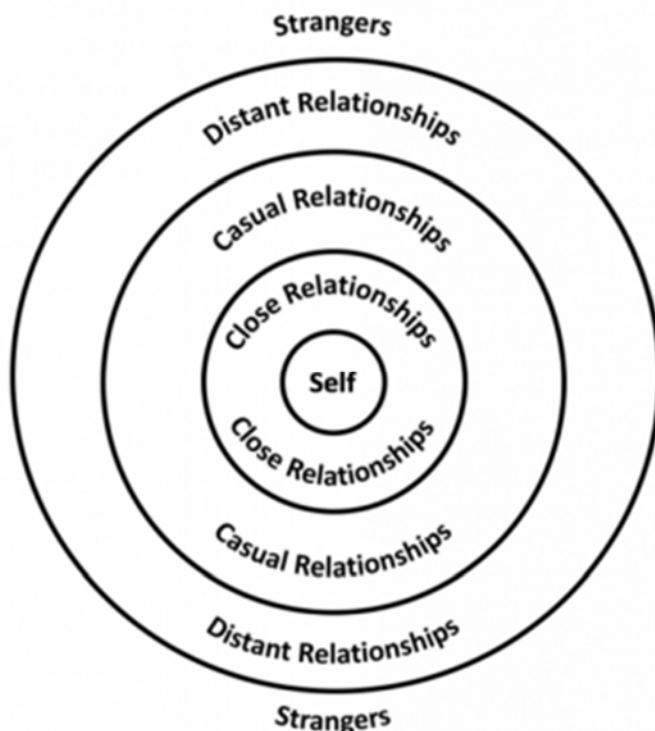

---

Q12 The circle at the center of this picture represents you and the five circles that radiate from the center circle represent relationship closeness. If you were to organize all of your interpersonal relationships on this diagram, your closest relationships would be placed next to the center circle, your most distant acquaintance would be placed outside the outermost circle, and the rest of your relationships would be arrayed between the innermost and outermost

circles based on how close they are to you.

For this exercise, please think about **someone who is very close to you**. This person would be **located on the innermost circle in the picture above**.

Now that you've thought about this person, on the next page please provide their name and a brief description of your relationship with that person (**e.g., father, spouse, brother, best friend**).

*REMINDER: The person you name must be at least 18 years old.*

End of Block: Relationship Prompt: Close

---

Start of Block: Relationship Prompt: Distant

Q251 In the first part of this survey you will be asked to think about a person in your life who you would consider **a distant acquaintance**. Please think of an actual relationship that you have with another person. The goal here is for you to think about the person in your life that you would categorize as **one of your most distant acquaintances**. *IMPORTANT: The person you are thinking about must be at least 18 years old.* The following picture is provided to help you think about this person and how he/she fits into your social network:

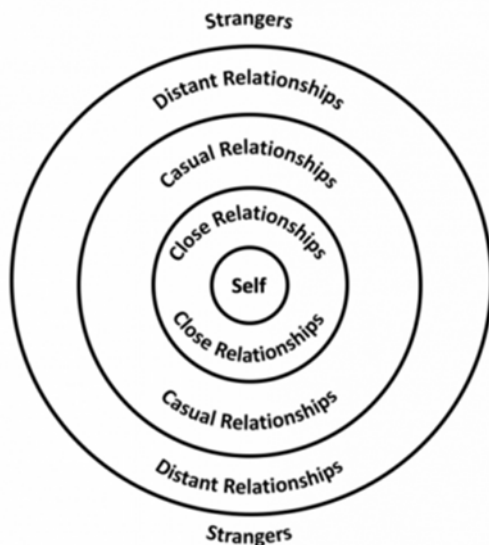

Q253 The circle at the center of this picture represents you and the five circles that radiate from the center circle represent relationship closeness. If you were to organize all of your interpersonal relationships on this diagram, your closest relationships would be placed next to

the center circle, your most distant acquaintance would be placed outside the outermost circle, and the rest of your relationships would be arrayed between the innermost and outermost circles based on how close they are to you.

For this exercise, please think about **someone who is a very distant acquaintance**. This person would be **located on the outermost circle in the picture above**.

Now that you've thought about this person, on the next page please provide their name and a brief description of your relationship with that person (**e.g., mailman, landlord, neighbor, dentist**).

*REMINDER: The person you name must be at least 18 years old.*

End of Block: Relationship Prompt: Distant

---

Start of Block: Person Nomination

Q66 What is this person's **first name**?

\_\_\_\_\_

Q67 How would you describe this relationship?

\_\_\_\_\_

Q68 *\* All information provided will be treated as anonymous and confidential. All information, publications, and data files associated with this project will be released in a way that insures that no individuals can be identified.*

End of Block: Person Nomination

---

Start of Block: Behavior Evaluation: Intro

Q59 During the next phase of the study, you will be asked to consider a scenario involving a behavior. Please read the scenario carefully. It is important that you do your best to immerse yourself in the scenario and respond as if you were really experiencing the situation being described.

Although you may be asked to think about people that you know in ways that you are not

accustomed to, the validity of our research depends on your cooperation.

Remember, there are no "right" or "wrong" answers to these questions. You will not be asked to justify your responses. Simply respond in whatever manner you believe to be accurate.

#### End of Block: Behavior Evaluation: Intro

---

#### Start of Block: High Severity 1 - Immersed

Q266 You and \${Q66/ChoiceTextEntryValue} are sitting together at a coffee shop. At one point, you see that he/she is blackmailing a person for money by threatening to post an unflattering picture of them online. You are sure, without any doubt, that this is what happened. There is absolutely no way that this act could be mistaken for anything else.

Soon thereafter, a man approaches you and asks to speak with you. After you agree to speak with him, he shows you a badge and introduces himself as a law enforcement agent. He asks you if you have witnessed any suspicious activity today. In answering this question, you can either tell the officer that you **did see** or **did not see** \${Q66/ChoiceTextEntryValue} blackmailing a person for money by threatening to post an unflattering picture of them online.

#### End of Block: High Severity 1 - Immersed

---

#### Start of Block: Self-Interest

Q48 To what extent is it in your own **self-interest** to tell the officer that you **did see** \${Q66/ChoiceTextEntryValue} commit the act in question?

|     | Not at all                                                                           |   | Somewhat |   | Very much |   |
|-----|--------------------------------------------------------------------------------------|---|----------|---|-----------|---|
|     | 1                                                                                    | 2 | 3        | 5 | 6         | 7 |
| ( ) |  |   |          |   |           |   |

Q50 To what extent is it in your own **self-interest** to tell the officer that you **did not see** \${Q66/ChoiceTextEntryValue} commit the act in question?

| Not at all |   | Somewhat |   | Very much |   |
|------------|---|----------|---|-----------|---|
| 1          | 2 | 3        | 5 | 6         | 7 |
|            |   |          |   |           |   |

|    |                                                                                    |
|----|------------------------------------------------------------------------------------|
| () |  |
|----|------------------------------------------------------------------------------------|

End of Block: Self-Interest

Start of Block: Loyalty

Q52 To what extent is it **disloyal** to tell the officer that you **did see** \${Q66/ChoiceTextEntryValue} commit the act in question?

|                                      |          |           |
|--------------------------------------|----------|-----------|
| Not at all                           | Somewhat | Very much |
| 1      2      3      5      6      7 |          |           |

|    |                                                                                    |
|----|------------------------------------------------------------------------------------|
| () |  |
|----|------------------------------------------------------------------------------------|

Q54 To what extent is it **disloyal** to tell the officer that you **did not see** \${Q66/ChoiceTextEntryValue} commit the act in question?

|                                      |          |           |
|--------------------------------------|----------|-----------|
| Not at all                           | Somewhat | Very much |
| 1      2      3      5      6      7 |          |           |

|    |                                                                                      |
|----|--------------------------------------------------------------------------------------|
| () |  |
|----|--------------------------------------------------------------------------------------|

End of Block: Loyalty

Start of Block: Harm

Q56 How much are you considering the **harm** (i.e., physical or emotional suffering) which would come to \${Q66/ChoiceTextEntryValue} when making your decision?

|                                      |      |       |
|--------------------------------------|------|-------|
| None                                 | Some | A lot |
| 1      2      3      5      6      7 |      |       |

|    |                                                                                      |
|----|--------------------------------------------------------------------------------------|
| () |  |
|----|--------------------------------------------------------------------------------------|

---

Q58 How much are you considering the harm (i.e., physical or emotional suffering) which would come **to other people** (not including \${Q66/ChoiceTextEntryValue}) when making your decision?

|     | None                                                                               |   | Some |   | A lot |   |
|-----|------------------------------------------------------------------------------------|---|------|---|-------|---|
|     | 1                                                                                  | 2 | 3    | 5 | 6     | 7 |
| ( ) |  |   |      |   |       |   |

End of Block: Harm

Start of Block: Perspective-Taking

Q59 To what extent are you **trying to get inside** \${Q66/ChoiceTextEntryValue}'s head and determine why he/she committed the crime?

|     | Not at all                                                                           |   | Somewhat |   | Very much |   |
|-----|--------------------------------------------------------------------------------------|---|----------|---|-----------|---|
|     | 1                                                                                    | 2 | 3        | 5 | 6         | 7 |
| ( ) |  |   |          |   |           |   |

End of Block: Perspective-Taking

Start of Block: Decision

Q44 In your response to the officer, **how likely** are you to tell him that you **did** **see** \${Q66/ChoiceTextEntryValue} commit the act in question?

|     | Very unlikely                                                                        | Unlikely | Somewhat unlikely | Somewhat likely | Likely | Very likely |
|-----|--------------------------------------------------------------------------------------|----------|-------------------|-----------------|--------|-------------|
|     | 1                                                                                    | 2        | 3                 | 5               | 6      |             |
| ( ) |  |          |                   |                 |        |             |

End of Block: Decision

## Start of Block: Demographics

Q106 This is the last page of the survey! We are interested in learning more about your background.

---

Q107 What is your gender?

- ☐ Male (1)
- ☐ Female (2)
- ☐ Other, please specify (3) \_\_\_\_\_
- 

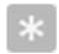

Q108 What is your age?

\_\_\_\_\_

Q109 What is your race?

- ☐ White (1)
- ☐ Asian (2)
- ☐ Black or African American (3)
- ☐ Hispanic / Latino (4)
- ☐ Native Hawaiian or Pacific Islander (5)
- ☐ Native American (6)
- ☐ Other (7) \_\_\_\_\_
-

Q28 How would you describe your political orientation?

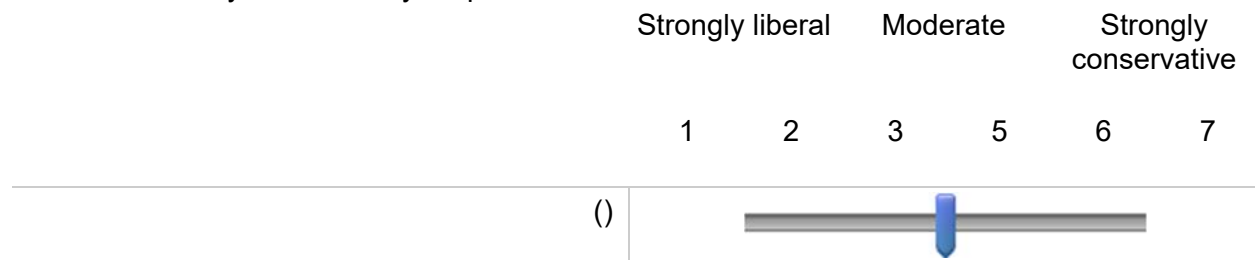

Q110 It is very important for us to have reliable and valid data. Would you recommend that we use your responses to this survey as part of our study?

☐ Yes (1)

☐ No (2)

End of Block: Demographics

# Study 2a

---

## Start of Block: Distant Instructions

Q45 In the first part of this survey, you will be asked to think about two people in your life who you would consider **distant acquaintances**. Please think actual relationships that you have with other people. The goal here is for you to think about the people in your life that you would categorize as **your most distant acquaintances**. *IMPORTANT: The people you are thinking about must be at least 18 years old.* The following picture is provided to help you think about these people and how they fit into your social network:

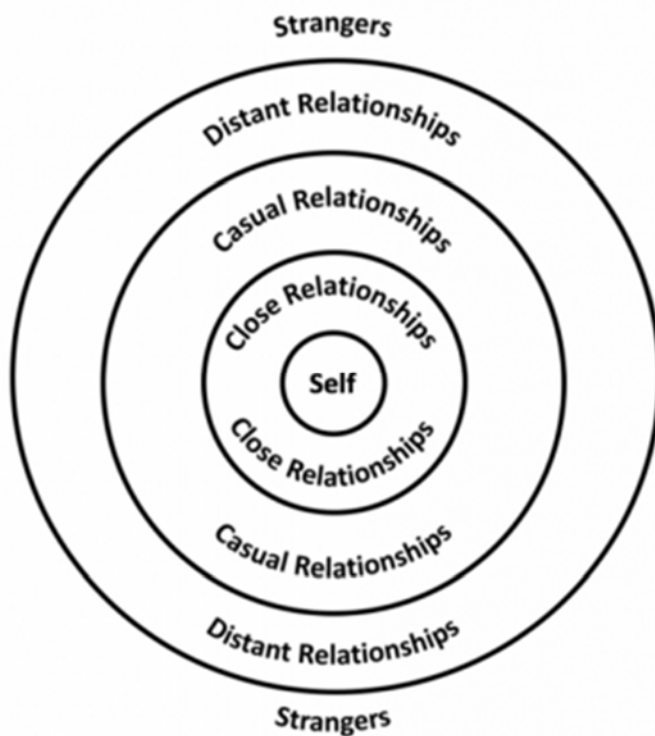

---

Q49 The circle at the center of this picture represents you and the five circles that radiate from the center circle represent relationship closeness. If you were to organize all of your interpersonal relationships on this diagram, your closest relationships would be placed next to the center circle, your most distant acquaintance would be placed outside the outermost circle, and the rest of your relationships would be arrayed between the innermost and outermost circles based on how close they are to you.

For this exercise, please think about two people who are **very distant acquaintances**. These

people would be **located on the outermost circle in the picture above**.

Now that you've thought about these people, on the next page please provide their names and a brief description of your relationship with each person (**e.g., mailman, landlord, neighbor, dentist**).

*REMINDER: The people you name must be at least 18 years old.*

---

### Start of Block: Close Instructions

Q37 In the first part of this survey, you will be asked to think about two people in your life who you would consider yourself **very close to**. Please think of actual relationships that you have with other people. The goal here is for you to think about the two people in your life that you would categorize as **your closest relationships**. *IMPORTANT: Both people you are thinking about must be at least 18 years old.* The following picture is provided to help you think about each of these people and how they fit into your social network:

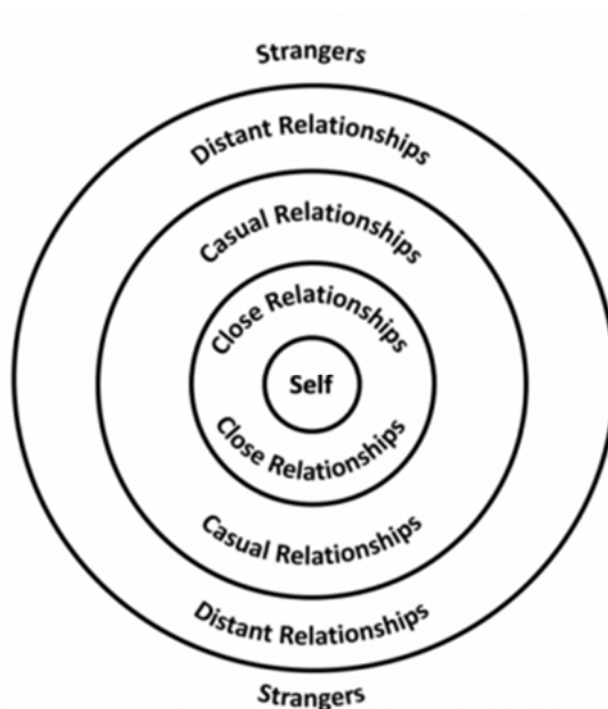

---

Q41 The circle at the center of this picture represents you and the five circles that radiate from the center circle represent relationship closeness. If you were to organize all of your interpersonal relationships on this diagram, your closest relationships would be placed next to

the center circle, your most distant acquaintance would be placed outside the outermost circle, and the rest of your relationships would be arrayed between the innermost and outermost circles based on how close they are to you.

For this exercise, please think about two people who are **very close to you**. These people would be **located on the innermost circle in the picture above**.

Now that you've thought about these two people, on the next page please provide their names and a brief description of your relationship with each person (**e.g., father, spouse, brother, best friend**).

*REMINDER: The people you name must be at least 18 years old.*

#### End of Block: Close Instructions

---

#### Start of Block: Identify 2 people

Q54 Please provide the first names of the two people you thought of, and briefly describe your relationship with each of them.

name1 First name:

---

relat1 How would you describe this relationship?

---

name2 First name:

---

relat2 How would you describe this relationship?

---

---

Q49 \* All information provided will be treated as anonymous and confidential. All information, publications, and data files associated with this project will be released in a way that insures that no individuals can be identified.

End of Block: Identify 2 people

---

Start of Block: Task Intro

Q53 You will now be asked to consider a scenario involving a behavior. Please read the scenario carefully, **immerse yourself in the scenario**, and respond as if you were really experiencing the situation being described.

Although you may be asked to think about people that you know in ways that you are not accustomed to, the validity of our research depends on your cooperation.

There are no "right" or "wrong" answers to these questions. Simply respond in whatever manner you believe to be accurate.

End of Block: Task Intro

---

Start of Block: Dilemma 1 - blackmail

D1 You and **{e://Field/Person}** are sitting together at a coffee shop. At one point, you see that **{e://Field/Person}** is blackmailing a person for money by threatening to post an unflattering picture of them online. You are sure, without any doubt, that this is what happened. There is absolutely no way that this act could be mistaken for anything else.

End of Block: Dilemma 1 - blackmail

---

Start of Block: DV 1 - trial A

moral\_A **How immoral** is the act that **{e://Field/Person}** committed?

Not at all immoral

Very immoral

1      2      3      4      5      6      7

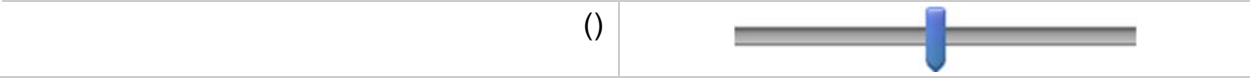

End of Block: DV 1 - trial A

Start of Block: DV 2 - trial A

wrong\_A **How wrong** is the act that \${e://Field/Person} committed?

|                  |   |   |   |            |   |   |
|------------------|---|---|---|------------|---|---|
| Not at all wrong |   |   |   | Very wrong |   |   |
| 1                | 2 | 3 | 4 | 5          | 6 | 7 |

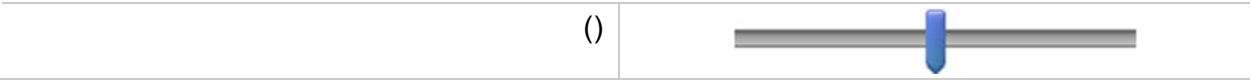

End of Block: DV 2 - trial A

# Study 3

---

## Start of Block: Intro

Q34 Thank you for participating in this study!

This study examines how people evaluate another person's behavior. It should take about 10 minutes to complete. All answers will remain confidential. Please answer the questions to the best of your ability. There are no right or wrong answers.

---

## End of Block: Intro

---

## Start of Block: Distant Instructions

Q45 In the first part of this survey, you will be asked to think about a person in your life who you would consider a **distant acquaintance**. Please think about an actual relationship that you have with another person. The goal here is for you to think about the person in your life that you would categorize as **your most distant acquaintance**. *IMPORTANT: The person you are thinking about must be at least 18 years old.* The following picture is provided to help you think about this person and how he/she fits into your social network:

Q47

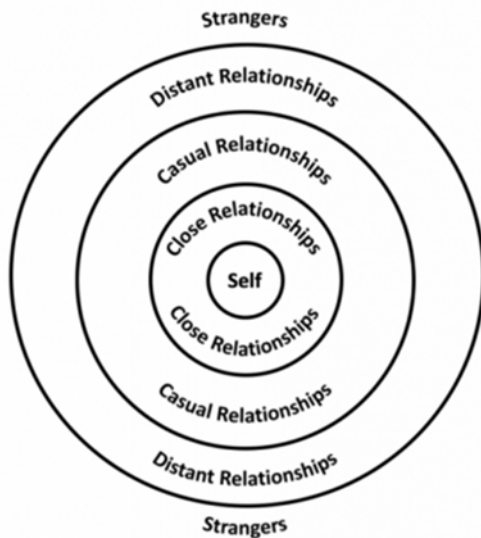

---

Q49 The circle at the center of this picture represents you and the five circles that radiate from the center circle represent relationship closeness. If you were to organize all of your

interpersonal relationships on this diagram, your closest relationships would be placed next to the center circle, your most distant acquaintance would be placed outside the outermost circle, and the rest of your relationships would be arrayed between the innermost and outermost circles based on how close they are to you.

For this exercise, please think about a person who is a **very distant acquaintance**. This person would be **located on the outermost circle in the picture above**.

Now that you've thought about this person, on the next page please provide his/her name and a brief description of your relationship with this person (**e.g., mailman, landlord, neighbor, dentist**).

*REMINDER: The person you name must be at least 18 years old.*

#### End of Block: Distant Instructions

---

#### Start of Block: Close Instructions

Q37 In the first part of this survey, you will be asked to think about a person in your life who you would consider yourself **very close to**. Please think of an actual relationship that you have with another person. The goal here is for you to think about the person in your life that you would categorize as **your closest relationship**. *IMPORTANT: The person you are thinking about must be at least 18 years old.* The following picture is provided to help you think about this person and how he/she fits into your social network:

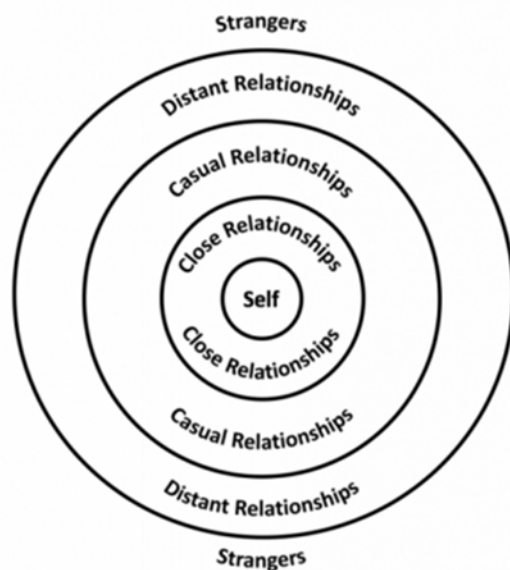

Q41 The circle at the center of this picture represents you and the five circles that radiate from the center circle represent relationship closeness. If you were to organize all of your interpersonal relationships on this diagram, your closest relationships would be placed next to the center circle, your most distant acquaintance would be placed outside the outermost circle, and the rest of your relationships would be arrayed between the innermost and outermost circles based on how close they are to you.

For this exercise, please think about a person who is **very close to you**. This person would be **located on the innermost circle in the picture above**.

Now that you've thought about this person, on the next page please provide his/her name and a brief description of your relationship with this person (**e.g., father, spouse, brother, best friend**).

*REMINDER: The person you name must be at least 18 years old.*

End of Block: Close Instructions

---

Start of Block: Identify 1 person

Q54 Please provide the first name of the person you thought of, and briefly describe your relationship with him/her.

name First name:

---

relat What is your relationship to this person?

---

Q49 \* All information provided will be treated as anonymous and confidential. All information, publications, and data files associated with this project will be released in a way that insures that no individuals can be identified.

End of Block: Identify 1 person

---

Start of Block: Task Intro

Q53 You will now be asked to consider a scenario involving a behavior. Please read the scenario carefully, **immerse yourself in the scenario**, and respond as if you were really experiencing the situation being described.

Although you may be asked to think about people that you know in ways that you are not accustomed to, the validity of our research depends on your cooperation.

There are no "right" or "wrong" answers to these questions. Simply respond in whatever manner you believe to be accurate.

End of Block: Task Intro

---

Start of Block: Dilemma 1 - blackmail

D1 You and **\$(e://Field/Person)** are sitting together at a coffee shop. At one point, you see that **\$(e://Field/Person)** is blackmailing a person for money by threatening to post an unflattering picture of them online. You are sure, without any doubt, that this is what happened. There is absolutely no way that this act could be mistaken for anything else. You also happen to have noticed that a police officer was in the coffee shop during this time, and you are virtually certain that he noticed **\$(e://Field/Person)** engaging in blackmail.

End of Block: Dilemma 1 - blackmail

---

Start of Block: Free Response

What action would you take in response to witnessing **\$(e://Field/Person)**'s actions?

Please consider actions *right in the moment* and *down the line* in your relationship with **\$(e://Field/Person)**.

Please write several sentences below describing the action you would take.

---

---

---

---

---

End of Block: Free Response



# Study 4a

---

## Start of Block: Section 4 (Social-Relational Network)

In the first part of this questionnaire, you will be asked to think about nine different people. These people are actual individuals from your own personal social network. Your social network is the aggregate of your interpersonal relationships.

For our purposes, the word relationship is a broad term that includes all of your mutual interpersonal interactions. This means that your social network includes all of your relationships, from the very intimate (e.g., romantic partners and best friends) to the very casual (e.g., school administrator and other students) with everything in-between (e.g., teammates and extended family members). The goal here is to have these nine people represent the full spectrum of your social-relational network.

As you think of each of these people you will be asked to provide their name\*, gender, and a brief description of the relationship (e.g., mother, graduate student instructor, cafe barista).

To help you think about these nine people and where they fit in your social network, you will be presented the following picture of nine pairs of circles for each relationship:

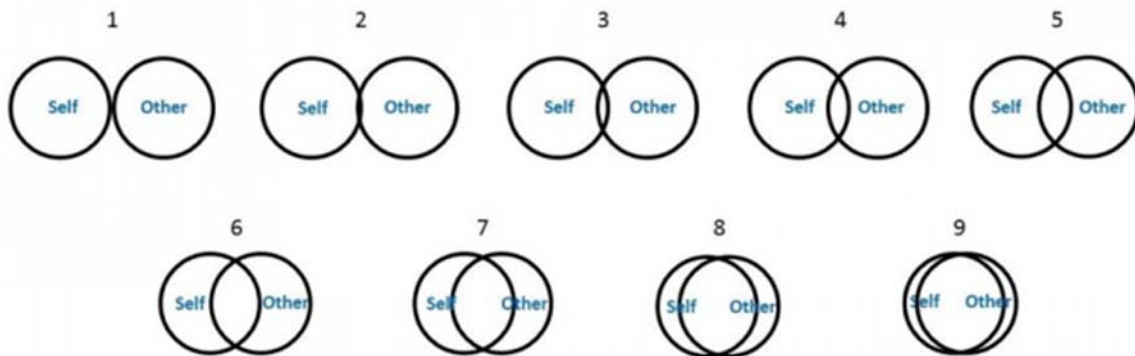

As you see, the nine pairs of circles are ordered by increasing degree of overlap. One of the circles in each pair represents you and the other represents the other person in the relationship. The overlap between the two circles represents the level of interpersonal closeness between you and the other person in the relationship. The first (1) pair of circles represents a relationship between you and another person with minimal closeness and the ninth (9) pair represents a relationship between you and another person where there is maximum closeness.

As you think of each of the nine people, it is important that they are at least 14 years old.

*\* Please only use first names. All information provided will be treated as anonymous and confidential. All information, publications, and data files associated with this project will be released in a way that insures that no individual can be identified.*

#### End of Block: Section 4 (Social-Relational Network)

---

#### Start of Block: High Closeness Relationships Block

##### HIRIOS

Using the image above, think of three people in your life in which your relationship with each person is best characterized by either the seventh (7), eighth (8) or ninth (9) set of circles (those highlighted in red, above). These are the people you are the closest to (e.g., spouse / partner, boyfriend / girlfriend, best friend, mother, child). Please list the first names of these three people (note: each person must be at least 14 years old):

-----

HI-R1 Person one:

\_\_\_\_\_

-----

HI-R2 Person two:

\_\_\_\_\_

-----

HI-R3 Person three:

\_\_\_\_\_

HIR1G What is \${HI-R1/ChoiceTextEntryValue}'s gender?

☐ Male (1)

☐ Female (2)

---

HIR1R Please describe \${HI-R1/ChoiceTextEntryValue} in terms of your relationship (e.g., spouse, long-term partner, boyfriend / girlfriend, best friend, mother, child).

---

**Start of Block: Medium Closeness Relationships Block**

**MIEIOS**

Using the image above, think of three people in your life in which your relationship with each person is best characterized by either the fourth (4), fifth (5), or sixth (6) set of circles (those highlighted in red, above). These are the people in your life that you are moderately close with (e.g., father, sibling, mentor at work or school, teammate, work or school peer). Please list the first names of these three people (note: each person must be at least 14 years old):

---

MIR1 Person one:

---

MIR2 Person two:

---

MIR3 Person three:

MIR1G What is \${MIR1/ChoiceTextEntryValue}'s gender?

☐ Male (1)

☐ Female (2)

---

MIR1R Please describe \${MIR1/ChoiceTextEntryValue} in terms of your relationship (e.g., father, sibling, mentor at work or school, teammate, work or school peer).

---

Start of Block: Low Closeness Relationship Block

LIRIOS

Using the image above, think of three people in your life in which your relationship with each person is best characterized by either the first (1), second (2), or third (3) set of circles (those highlighted in red, above). These are the people in your life that you have a relationship with, but are not very close to (e.g., your supervisor at work, advisor at school, physician, dentist, neighbor, pharmacist, postal worker). Please list the first names of these three people. However, if you can't recall their name just write a very brief description (i.e., postman, dentist, coworker). Please ensure that each person must be at least 14 years old.

---

LIR1 Person one:

---

---

LIR2 Person two:

---

---

LIR3 Person three:

---

LIR1G What is \${LIR1/ChoiceTextEntryValue}'s gender?

- ☐ Male (1)
- ☐ Female (2)
- 

LIR1R Please describe \${LIR1/ChoiceTextEntryValue} in terms of your relationship (e.g., supervisor at work, advisor at school, physician, dentist, neighbor, pharmacist, or postman).

---

---

#### Start of Block: Section 5-G1 (Relational Dilemma - Immersed Instructions)

One of the things we are interested in in this study are the different ways people think about themselves when they make decisions. Some people report thinking about themselves using **first person pronouns**, so that's what we'd like you to do. In the next part of this study you will be placed in a series of situations. In each of these situations you will be asked to make a decision. Please use **the first person pronouns, I, me, and my** as you think about and decide what to do in each situation. In other words, as you think about what is happening in each situation, ask yourself things like, "What facts am I considering as I make this decision."

Before you begin please take a moment and practice using **first person pronouns (e.g., I, me, and my)** as you make decisions. Think about a few decisions that you have to make in the near future. As you think about these decisions use **first person pronouns**. Here are few examples: "What should **I** have for dinner tonight?" "What **am I** going to do this weekend?" "**My** favorite ice cream is..."

Once you've practiced using **first person pronouns** and you feel comfortable making decisions using **first person pronouns** press the next arrow to begin.

You will now be placed in a series of situations. Please do your best to believe that you are actually witnessing what's being described.

---

#### End of Block: Section 5-G1 (Relational Dilemma - Immersed Instructions)

---

#### Start of Block: G1 - High Closeness - Relationship 1- Illegally Download

HC1ID I have just witnessed \${HI-R1/ChoiceTextEntryValue} (my \${HIR1R/ChoiceTextEntryValue}) illegally download music over the internet without paying for it. A police officer approaches me and asks "do you know anything about this?" I answer:

- ☐ Yes, \${HI-R1/ChoiceTextEntryValue} (my \${HIR1R/ChoiceTextEntryValue}) did illegally download music over the internet without paying for it (1)
- ☐ No, \${HI-R1/ChoiceTextEntryValue} (my \${HIR1R/ChoiceTextEntryValue}) did not illegally download music over the internet without paying for it (2)

End of Block: G1 - High Closeness - Relationship 1- Illegally Download

Start of Block: G1 - Illegally Download Reply

re IL Now please indicate the extent to which you agree with the following statements regarding the previous question.

|                                           | Strongly disagree (1) | disagree (2)          | Disagree a little (3) | Neither agree nor disagree (4) | Agree a little (5)    | agree (6)             | Strongly agree (7)    |
|-------------------------------------------|-----------------------|-----------------------|-----------------------|--------------------------------|-----------------------|-----------------------|-----------------------|
| I am satisfied with this decision (1)     | <input type="radio"/> | <input type="radio"/> | <input type="radio"/> | <input type="radio"/>          | <input type="radio"/> | <input type="radio"/> | <input type="radio"/> |
| This is a good decision (2)               | <input type="radio"/> | <input type="radio"/> | <input type="radio"/> | <input type="radio"/>          | <input type="radio"/> | <input type="radio"/> | <input type="radio"/> |
| This was a difficult decision to make (3) | <input type="radio"/> | <input type="radio"/> | <input type="radio"/> | <input type="radio"/>          | <input type="radio"/> | <input type="radio"/> | <input type="radio"/> |

End of Block: G1 - Illegally Download Reply

Start of Block: Section 6-G2 (Relational Dilemma - Distanced Instructions)

One of the things we are interested in in this study are the different ways people think about themselves when they make decisions. Some people report thinking about themselves using **their own name, and other non-first person pronouns**, so that's what we'd like you to

do. In the next part of this study you will be placed in a series of situations. In each of these situations you will be asked to make a decision. Please use **your name, and other non-first person pronouns** as you think about and decide what to do in each situation. In other words, as you think about what is happening in each situation, ask yourself things like, “What facts is **\${Name/ChoiceTextEntryValue}** considering as **\${Name/ChoiceTextEntryValue}** makes this decision.”

Before you begin please take a moment and practice using **your name, and other non-first person pronouns** as you make decisions. Think about a few decisions that you have the make in the near future. As you think about these decisions use **your name, and other non-first person pronouns**. Here are few examples: “What should **\${Name/ChoiceTextEntryValue}** have for dinner tonight?” “What is **\${Name/ChoiceTextEntryValue}** going to do this weekend?” “**\${Name/ChoiceTextEntryValue}**'s favorite ice cream is...”

Once you’ve practiced using **your name, and other non-first person pronouns** and you feel comfortable making decisions using **first your name, and other non-first person pronouns** press the next arrow to begin.

RD\_DIS You will now be placed in a series of situations. Please do your best to believe that you are actually witnessing what’s being described.

End of Block: Section 6-G2 (Relational Dilemma - Distanced Instructions)

---

Start of Block: G2 - High Closeness - Relationship 1 - Illegally Download

HC1ID **\${Name/ChoiceTextEntryValue}** has just witnessed **\${HI-R1/ChoiceTextEntryValue}** (**\${Name/ChoiceTextEntryValue}**'s **\${HIR1R/ChoiceTextEntryValue}**) illegally download music over the internet without paying for it. A police officer approaches **\${Name/ChoiceTextEntryValue}** and asks "do you know anything about this?" **\${Name/ChoiceTextEntryValue}** answers:

- ☐ Yes, **\${HI-R1/ChoiceTextEntryValue}** (**\${Name/ChoiceTextEntryValue}**'s **\${HIR1R/ChoiceTextEntryValue}**) did illegally download music over the internet without paying for it. (1)
- ☐ No, **\${HI-R1/ChoiceTextEntryValue}** (**\${Name/ChoiceTextEntryValue}**'s **\${HIR1R/ChoiceTextEntryValue}**) did not illegally download music over the internet without paying for it. (2)

End of Block: G2 - High Closeness - Relationship 1 - Illegally Download

---

---

## Start of Block: IMC

**Sports Participation** Most modern theories of decision-making recognize the fact that decisions do not take place in a vacuum. Individual preferences and knowledge, along with situational variables can greatly impact the decision process. In order to facilitate our research on decision-making, we are interested in knowing certain factors about you, the decision-maker. Specifically we are interested in whether you actually take the time to read the directions: if not, then some of our manipulations that rely on changes in the instructions will be ineffective. In order to demonstrate that you have read these instructions, please select cricket, badminton, and swimming below and no other answer choices. Thank you very much.

**Which of these activities do you engage in regularly?**  
**(Click on all that apply)**

- ☐ skiing (1)
- ☐ soccer (2)
- ☐ snowboarding (3)
- ☐ running (4)
- ☐ hockey (5)
- ☐ football (6)
- ☐ cricket (7)
- ☐ tennis (8)
- ☐ basketball (9)
- ☐ cycling (10)
- ☐ swimming (11)
- ☐ badminton (12)

## End of Block: IMC

# Study 4b

---

## Start of Block: Name & Cover Story

Name Thank you for participating in this study!

The study that you're about to participate in examines how differences in the way people think about themselves affects how they think about others. We're especially interested in how the language people use to think about themselves influences how they think about their relationships.

Throughout this study we will be asking you to use specific types of language to refer to yourself as you make decisions. Because self-referential language is important to the study, we are going to ask you to provide us with your first name. This is not necessarily the name you were given at birth, but rather the name that you use when you refer to yourself. For example, your given name may be Robert, but when referring to yourself, you use the name "Bob."

Rest assured that even though you are providing us with your first name, any data gathered during this session will be made anonymous for data analytic purposes. By no means will individual responses be reported, nor will identities and responses be linked at any time during the data analysis or dissemination process.

Please type your first name here:

---

Thank you Thank you for providing your name!

Along with your name, it is also critical that you follow the instructions to the best of your ability. Although you may be asked to think about yourself and your relationships in ways that you are not accustomed to, the validity of our research depends on your cooperation. Thank you for your undivided attention and effort!

Once you are set and ready to go, please press the "next" button below to continue to the survey...

---

## End of Block: Name & Cover Story

---

### Start of Block: Close relationship (i.e., best friend) prompt

In the first part of this survey you will be asked to think about a person in your life that you would consider being very close too. This is an actual relationship that you have with another person.

The goal here is for you to think about the person in your life that you would categorize as your best friend.

The following picture is provided to help you think about this person and how he or she fits into your social network:

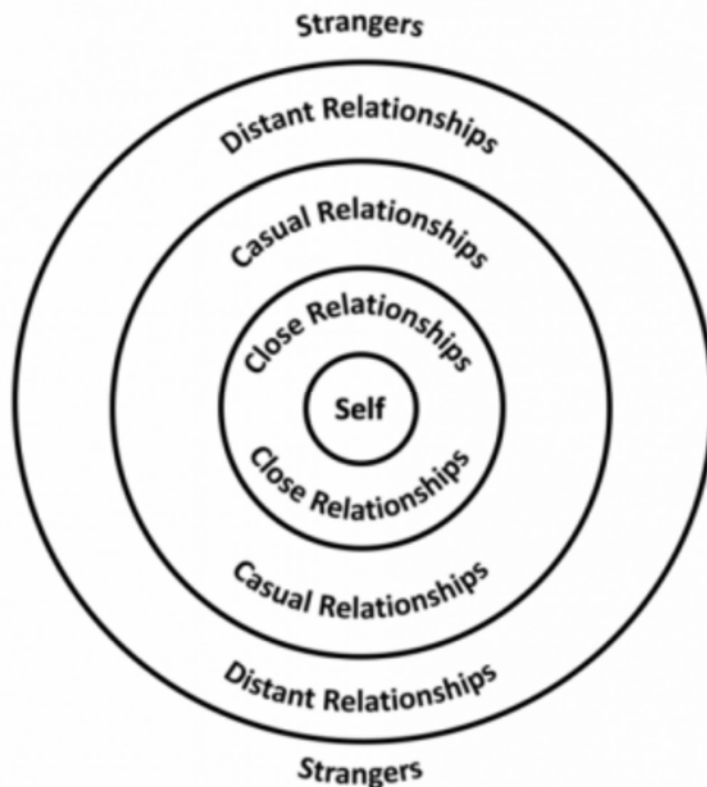

The circle at the center of this picture represents you and the five concentric circles that radiate from the center circle represent decreasing degrees of relationship closeness. If you were to organize all of your interpersonal relationships on this diagram, your closest relationships would be placed next to the center circle, your most distant relationship would be placed outside the outermost circle, and the rest of your relationships would be arrayed between the innermost and outermost circles based on how close they are to you.

For this exercise, please think about the person who you consider to be your closest friend (i.e., best friend). This person would be represented by the red dot located on the innermost circle in the picture above.

Now that you've thought about this person, please provide their name\* and gender.

*It is important that the person you are thinking about is at least 14 years old.*

Name Name:

---

Gender Gender:

☐ Male (1)

☐ Female (2)

---

*Cavet \* Please only use first names. All information provided will be treated as anonymous and confidential. All information, publications, and data files associated with this project will be released in a way that insures that no individuals can be identified.*

---

Start of Block: Loyalty dilemma - mild severity, immersed

You will now be placed in a situation. Please do your best to imagine the situation that is being described and believe that you are actually witnessing what is happening and are involved in the situation as it unfolds.

You and [\\${Name/ChoiceTextEntryValue}](#) are hanging out together at a local café. While at the café you observe [\\${Name/ChoiceTextEntryValue}](#) log in to his / her computer and illegally download a few songs over the Internet.

You are sure, without any doubt, that this is what happened. There is absolutely no way that this could be mistaken for anything else.

[\\${Name/ChoiceTextEntryValue}](#) leaves the café before you.

As you are leaving the café, a man stops you and asks to speak with you. After you agree to speak with him, he shows you a badge and introduces himself as a law enforcement agent investigating Internet-related crime. He asks you if you have witnessed any Internet related illegal activity such as hacking, fraud, or intellectual property theft (e.g., illegally downloading music) today.

In answering this question, you can either tell the officer that you **did** witness [\\${Name/ChoiceTextEntryValue}](#) illegally download the music or that you **did**

not see [\\${Name/ChoiceTextEntryValue}](#) illegally download the music.

We are interested in learning about the different ways people think. Some people report thinking to themselves in the first person (in other words, using the pronoun “I” when thinking about themselves) when engaging in certain activities, so this is one type of thought that we are interested in examining. For example, when doing something, someone might think: “I think... I feel...”

In a moment we are going to ask you to respond to the officer.

But first, in order to investigate the effects of first-person thinking on this decision, we would like you to write about what you are thinking and feeling about this situation for the next few minutes.

As you write about the thoughts and feelings that you are currently experiencing, please use the first person pronouns “I” and “me” as much as possible.

Why are you having the thoughts and feelings that you are having about this decision?

What underlying causes might exist for your current thoughts and feelings?

Please take a few minutes to write down what factors you are considering as you contemplate your response. Again, please use first person pronouns as you describe your deliberation by using first person pronouns such as I, me and my as you write.

---

---

---

---

---

In your response to the officer how likely are you to tell him that you did witness `\${Name/ChoiceTextEntryValue}` illegally download music over the Internet?

- ☐ Very Unlikely (1)
- ☐ Unlikely (2)
- ☐ Somewhat Unlikely (3)
- ☐ Somewhat Likely (4)
- ☐ Likely (5)
- ☐ Very Likely (6)

**Start of Block: Loyalty dilemma - mild severity, distanced**

You will now be placed in a situation. Please do your best to imagine the situation that is being described and believe that you are actually witnessing what is happening and are involved in the situation as it unfolds.

You and `\${Name/ChoiceTextEntryValue}` are hanging out together at a local café. While at the café you observe `\${Name/ChoiceTextEntryValue}` log in to his / her computer and illegally download a few songs over the Internet.

You are sure, without any doubt, that this is what happened. There is absolutely no way that this could be mistaken for anything else.

`\${Name/ChoiceTextEntryValue}` leaves the café before you.

As you are leaving the café, a man stops you and asks to speak with you. After you agree to speak with him, he shows you a badge and introduces himself as a law enforcement agent investigating Internet-related crime. He asks you if you have witnessed any Internet related illegal activity such as hacking, fraud, or intellectual property theft (e.g., illegally downloading music) today.

In answering this question, you can either tell the officer that you **did** witness `\${Name/ChoiceTextEntryValue}` illegally download the music or that you **did not** see `\${Name/ChoiceTextEntryValue}` illegally download the music.

We are interested in learning about the different ways people think. Some people report thinking to themselves in the third person (in other words, using non-first person pronouns like "you" or

their own names when thinking about themselves) when engaging in certain activities, so this is one type of thought that we are interested in examining. For example, when a person with the name *John* is doing something he might think "*John* is thinking that...He is feeling..."

In a moment we are going to ask you to respond to the officer.

But first, in order to investigate the effects of third-person thinking on this decision, we would like you to write about what you are thinking and feeling about this situation for the next few minutes.

As you write about the thoughts and feelings that you are currently experiencing, please use your own name (*#{Name/ChoiceTextEntryValue}*) and third person pronouns like "you" as much as possible.

Why are you having the thoughts and feelings that you are having about this decision?

What underlying causes might exist for your current thoughts and feelings?

Please take a few minutes to write down what factors you are considering as you contemplate your response. Again, please use your own name and other non-first person pronouns as you describe your deliberation by using your first name (*#{Name/ChoiceTextEntryValue}*) and third person pronouns like "you" as you write.

---

---

---

---

---

In your response to the officer how likely are you to tell him that you did witness [\\${Name/ChoiceTextEntryValue}](#) illegally download music over the Internet?

- ☐ Very Unlikely (1)
- ☐ Unlikely (2)
- ☐ Somewhat Unlikely (3)
- ☐ Somewhat Likely (4)
- ☐ Likely (5)
- ☐ Very Likely (6)
